# Supplementary material for: Large scale, flexible and three-dimensional quasi-ordered aluminum nanospikes for thin film photovoltaics with omnidirectional light trapping and optimized electrical design
Source: Royal Society of Chemistry journal article supplement (doi:10.1039/c4ee01850h), 2014-01-01
Supplement: c4ee01850h1.pdf [file c4ee01850h1.pdf]

# Large scale, Flexible and Three-dimensional Quasi-ordered Aluminum Nanospikes for Thin Film Photovoltaics with Omnidirectional Light Trapping and Optimized Electrical Design

*Siu-Fung Leung,<sup>a</sup> Kwong-Hoi Tsui,<sup>a</sup> Qingfeng Lin,<sup>a</sup> Hongtao Huang,<sup>b</sup> Linfeng Lu,<sup>b</sup> Jia-Min Shieh,<sup>c</sup>  
Chang-Hong Shen,<sup>c</sup> Chin-Hung Hsu,<sup>c</sup> [Qianpeng Zhang,<sup>a</sup>](#) Dongdong Li<sup>\*b</sup> and Zhiyong Fan<sup>\*a</sup>*

<sup>a</sup> Department of Electronic and Computer Engineering, Hong Kong University of Science and Technology, Clear Water Bay, Kowloon, Hong Kong, China. E-mail: [ezfan@ust.hk](mailto:ezfan@ust.hk)

<sup>b</sup> Shanghai Advanced Research Institute, Chinese Academy of Sciences, 99 Haike Road, Zhangjiang Hi-Tech Park, Pudong, Shanghai 201210, China. E-mail: [lidd@sari.ac.cn](mailto:lidd@sari.ac.cn)

<sup>c</sup> National Nano Device Laboratories (NDL), Hsinchu 30078, Taiwan, ROC.

## **Supplementary Information**

*Morphology characterization, optical reflectance and device performance characterization of solar cell*

Morphologies of the NSP and thin film were examined by SEM using a JEOL6700F at an accelerating voltage of 5kV. The *I-V* characteristics of all the solar cell were characterized by Oriel solar simulator, 450 W Xe lamp, AM 1.5 global illumination with output calibrated to 1 sun (100 mW cm<sup>-2</sup>) with monocrystalline reference cell (Newport corporation, 91150V) and Keithley 2400 source meter. EQE measurement was carried out by Oriel QE-PV-SI, Newport Corporation. Diffused reflectance spectra were carried out on the solar cell surface using a Perkin-Elmer UV/vis spectrophotometer (model Lambda 20).

*Daily integrated power output ratio*

The daily power output shown in Fig. 4c assumes that the solar cell and the sun are confined within the equatorial plane with the device facing the sun at noon. Efficiencies of solar cell from  $-60^\circ \sim 0^\circ \sim 60^\circ$  with  $10^\circ$  interval were measured under AM 1.5G condition. It is assumed that sunlight incident angle changed by  $10^\circ$  every 40 minutes. Therefore  $-60^\circ \sim 0^\circ \sim 60^\circ$  is corresponding to 8 a.m. to 4 p.m. and daily integrated power output ratio over planar is defined as the ratio between integrated efficiency of NSP solar cell from  $-60^\circ \sim 0^\circ \sim 60^\circ$  and integrated efficiency of planar solar cell from  $-60^\circ \sim 0^\circ \sim 60^\circ$ .

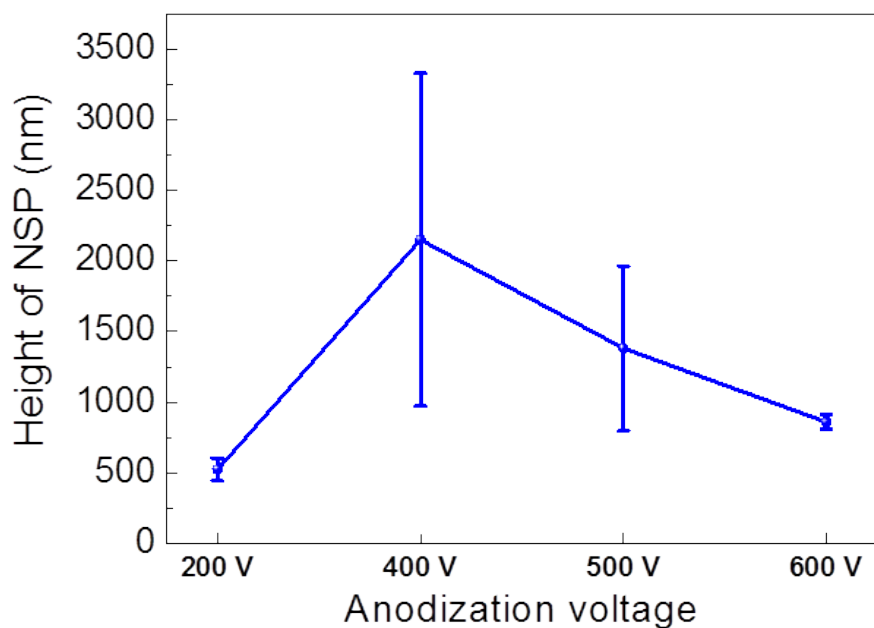

**Figure S1.** Statistical data of NSP height by different anodization voltages

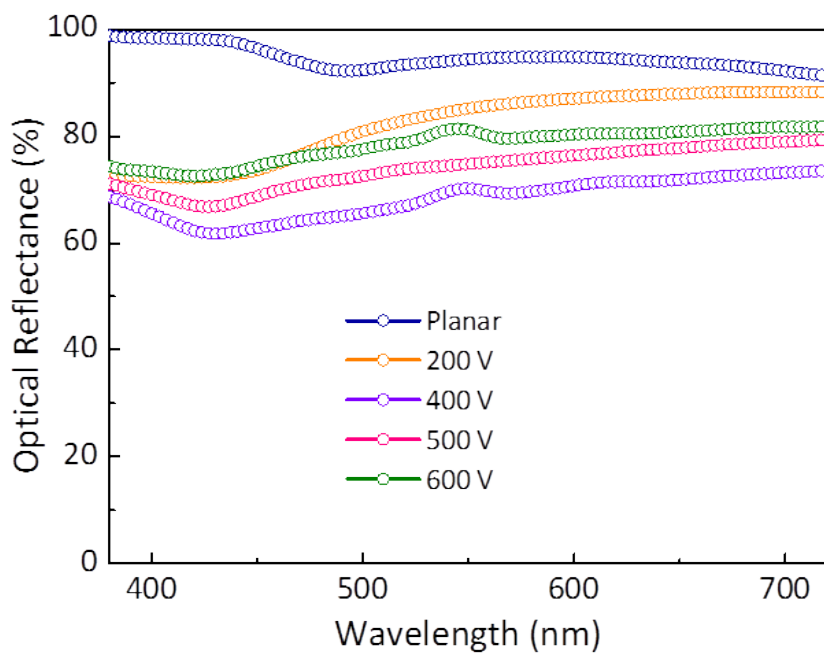

**Figure S2.** Normal incidence optical reflectance of NSP by different anodization voltages

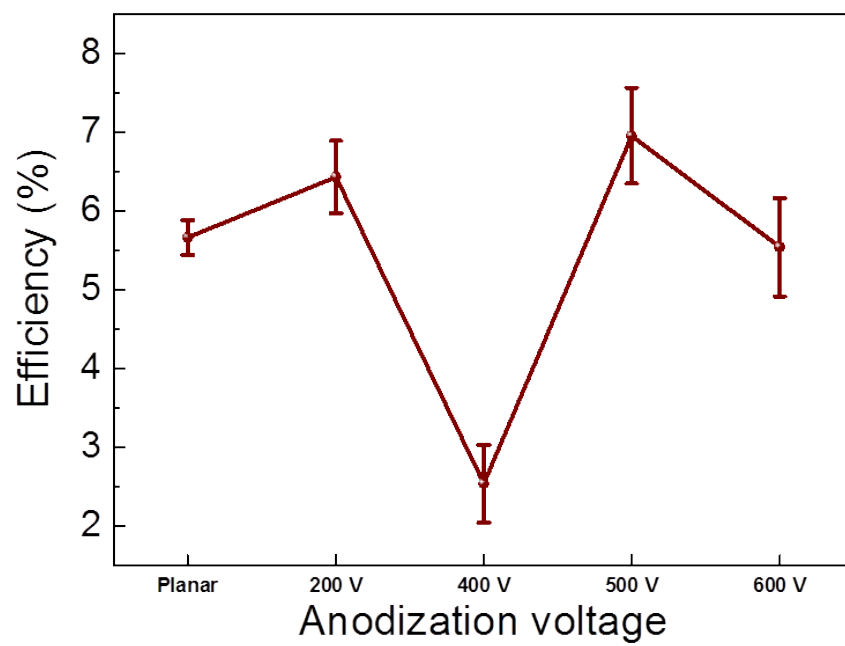

**Figure S3.** Statistical data of PV device efficiencies based on NSP by different anodization voltages

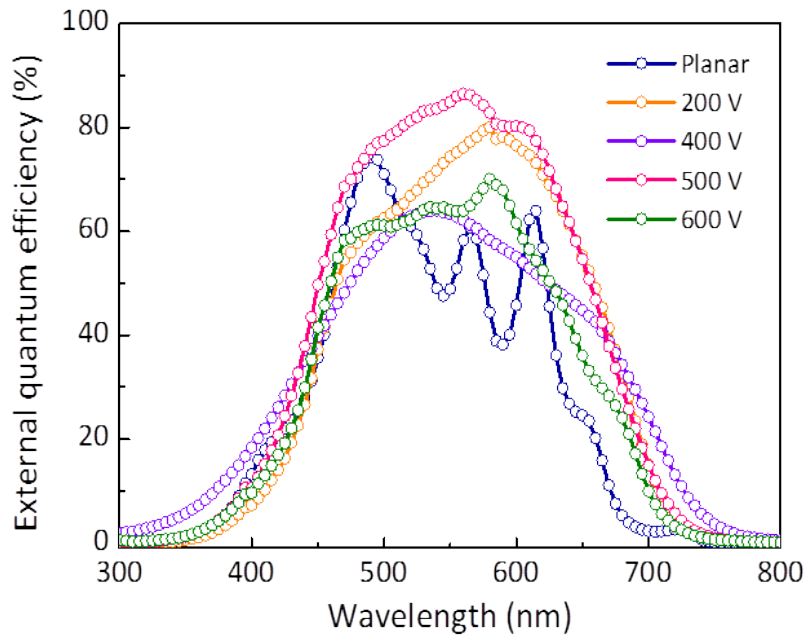

**Figure S4.** External quantum efficiency (EQE) of a-Si:H solar cells on different morphologies

NSP

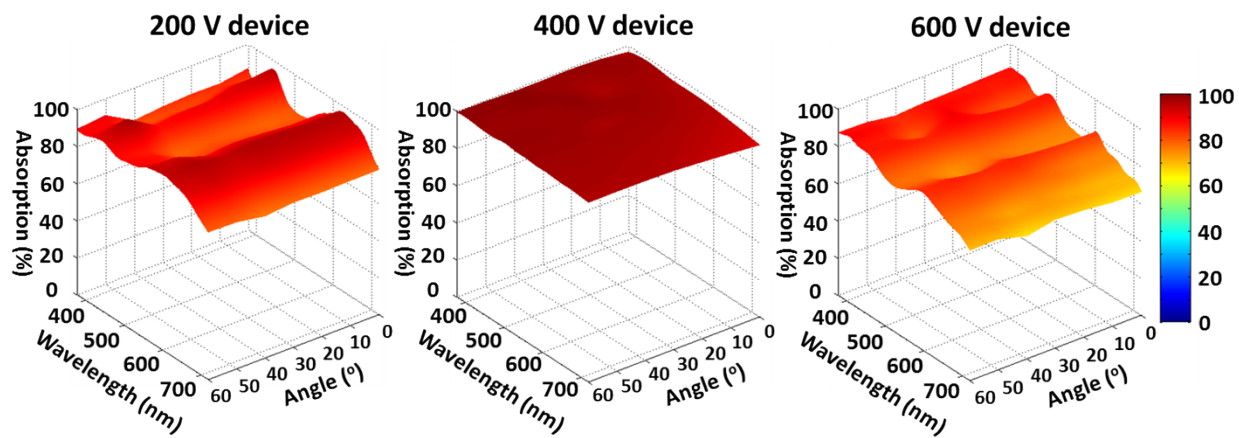

**Figure S5.** Angular and wavelength dependent absorption spectra of solar cell on 200 V, 400 V and 600 V NSP substrate
